# Supplementary material for: Nucleoside reverse transcriptase inhibitors and Kamuvudines inhibit amyloid-β induced retinal pigmented epithelium degeneration
Source: PubMed Central journal article supplement (PMC8044134; doi:10.1038/s41392-021-00537-z), 2021-04-14
Supplement: 41392_2021_537_MOESM1_ESM.pdf [file 41392_2021_537_MOESM1_ESM.pdf]

## Supplementary Materials for

### **Nucleoside reverse transcriptase inhibitors and Kamuvidines inhibit amyloid- $\beta$ induced retinal pigmented epithelium degeneration**

Siddharth Narendran<sup>1,2,3</sup>, Felipe Pereira<sup>1,2,4</sup>, Praveen Yerramothu<sup>1,2</sup>, Ivana Apicella<sup>1,2</sup>, Shao-bin Wang<sup>1,2</sup>, Kameshwari Ambati<sup>1,2</sup>, Shuichiro Hirahara<sup>1,2</sup>, Younghee Kim<sup>1,2</sup>, Meenakshi Ambati<sup>1,2,5</sup>, Vidya L. Ambati<sup>5</sup>, Peirong Huang<sup>1,2</sup>, Akhil Varshney<sup>1,2</sup>, Yosuke Nagasaka<sup>1,2</sup>, Shinichi Fukuda<sup>1,2</sup>, Kirstie L. Baker<sup>6</sup>, Kenneth M. Marion<sup>6</sup>, Jan M. Deussing<sup>7</sup>, Srinivas R. Sadda<sup>6,8</sup>, Bradley D. Gelfand<sup>1,2,9</sup> and Jayakrishna Ambati<sup>1,2,10,11</sup>

Correspondence: Jayakrishna Ambati ([ja9qr@virginia.edu](mailto:ja9qr@virginia.edu))

#### **This PDF file includes:**

Figures S1 to S10  
Table S1

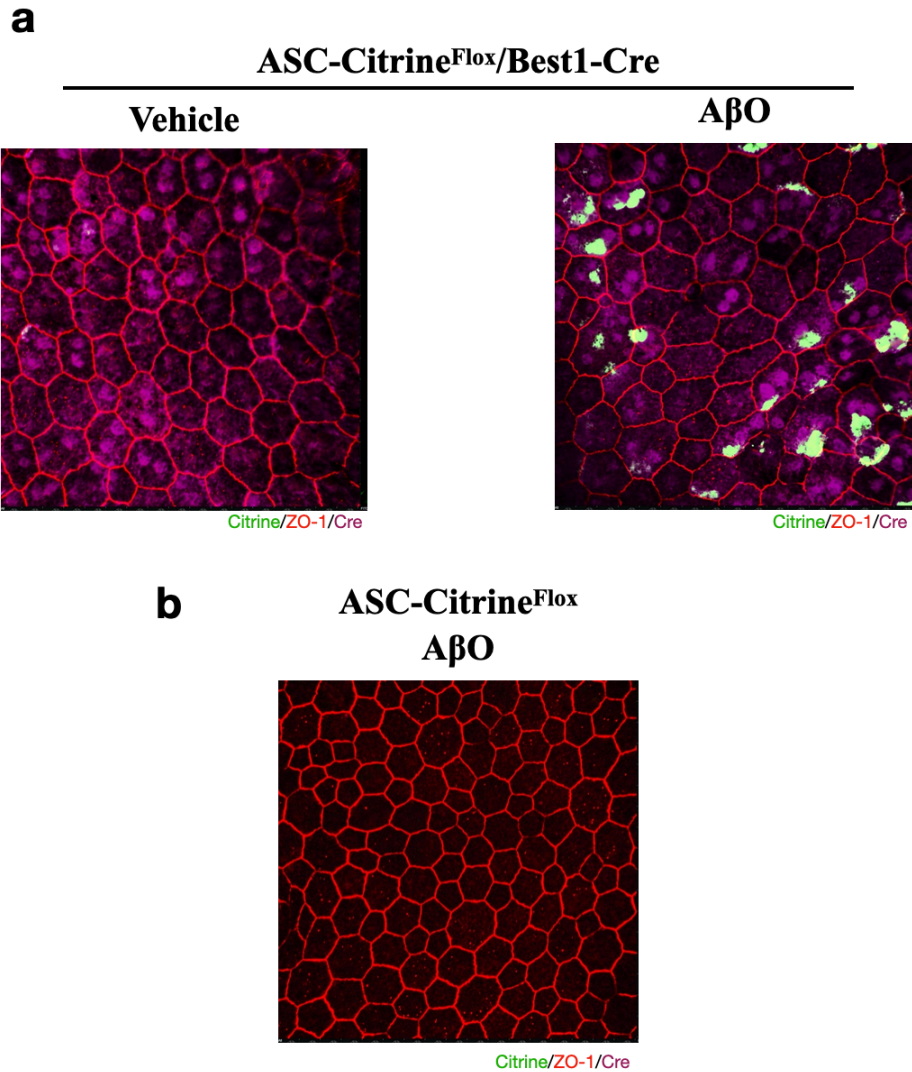

**Fig. S1 Subretinal injection of A $\beta$ O induces ASC speck formation in vivo.** Mice were treated with subretinal injection of 1  $\mu$ M A $\beta$ O, followed by intravitreal injection of caspase-1 inhibitor to prevent RPE degeneration and thereby preserve the ability to visualize inflammasome assembly. Tissues were collected at 48 h after injection. **(a)** RPE flat mount, stained for zonula occludens-1 (ZO-1; red), of ASC-Citrine<sup>Flox</sup>/Best1 Cre<sup>+</sup> mice injected with vehicle or A $\beta$ O illustrates the mosaic expression of Cre (purple) in these mice and the presence of the citrine signal (green) only in cells expressing Cre. **(b)** RPE flat mount of ASC-Citrine<sup>Flox</sup> mice injected with A $\beta$ O illustrates the absence of Cre staining (purple) and of the citrine signal (green) in these mice.

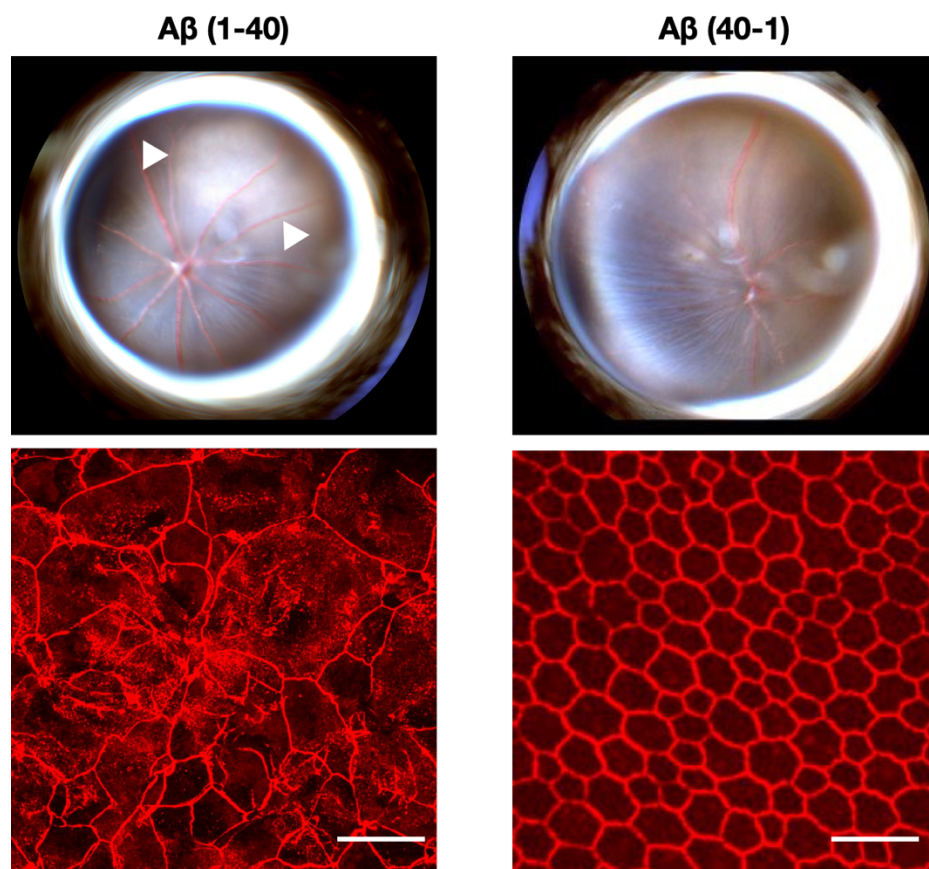

**Fig. S2 Soluble oligomers of A $\beta$  1-40 and not A $\beta$  40-1 induce RPE degeneration.** Mice were treated with subretinal injection of 1  $\mu$ M of the A $\beta$  1-40 peptide (left) or the reverse peptide A $\beta$  40-1 (right). Oligomers of A $\beta$  1-40 induced RPE degeneration whereas A $\beta$  40-1 oligomers did not. Fundus photographs, top row; Flat mounts stained for zonula occludens-1 (ZO-1; red), bottom row. Degeneration outlined by white arrowheads. Representative images of n = 4-6. Loss of regular hexagonal cellular boundaries in ZO-1 stained flat mounts is indicative of degenerated RPE. Scale bars (50  $\mu$ m).

**Vehicle in WT**

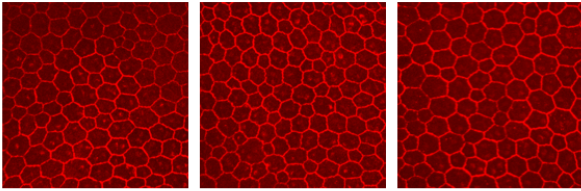

**A $\beta$ O in WT**

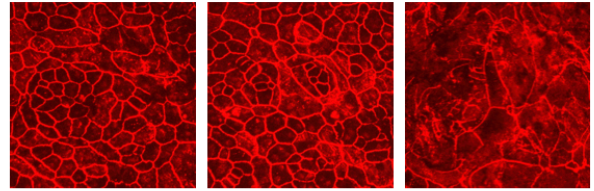

**Vehicle in *Nlrp3*<sup>-/-</sup>**

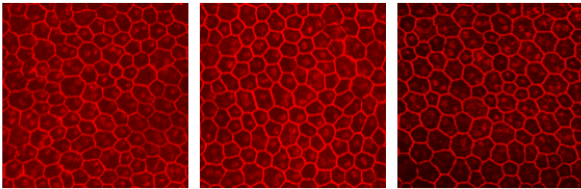

**A $\beta$ O in *Nlrp3*<sup>-/-</sup>**

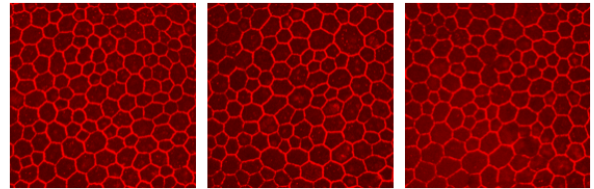

**Vehicle in *Pycard*<sup>-/-</sup>**

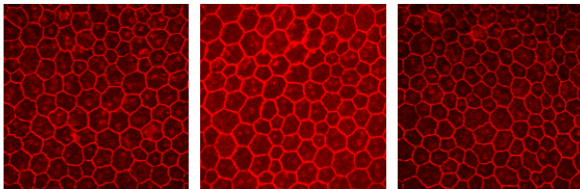

**A $\beta$ O in *Pycard*<sup>-/-</sup>**

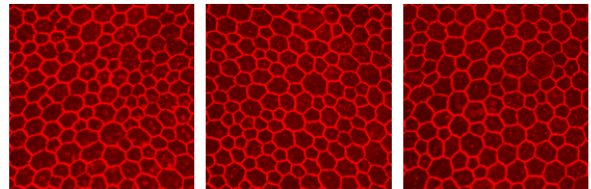

**Vehicle in *Casp1*<sup>-/-</sup>**

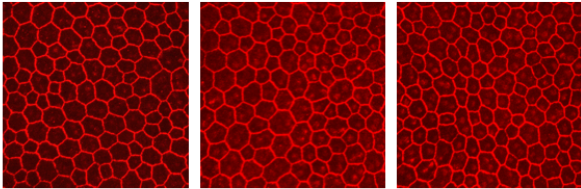

**A $\beta$ O in *Casp1*<sup>-/-</sup>**

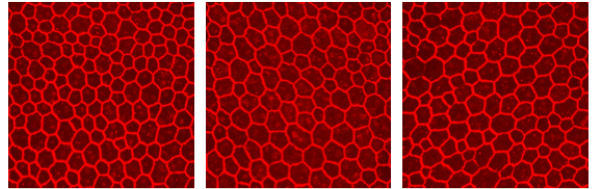

**Vehicle in *Gsdmd*<sup>-/-</sup>**

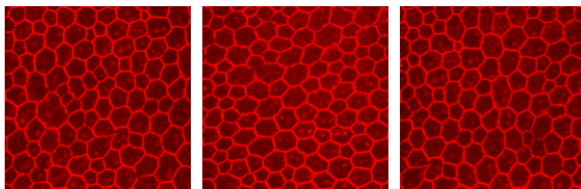

**A $\beta$ O in *Gsdmd*<sup>-/-</sup>**

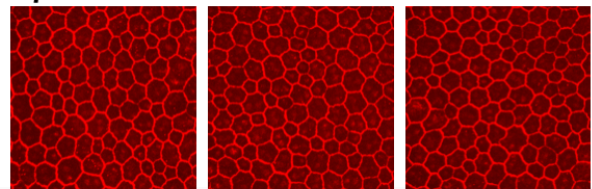

**Fig. S3 A $\beta$ O-induced RPE degeneration requires *Nlrp3*, *Casp1*, *Pycard*, and *Gsdmd*.** RPE flat mounts stained for zonula occludens-1 (ZO-1; red) show that subretinal injection of A $\beta$ O, but not PBS, induces RPE degeneration in WT mice but not in mice lacking *Nlrp3*, *Casp1*, *Pycard*, or *Gsdmd*. Loss of regular hexagonal cellular boundaries in ZO-1 stained flat mounts is indicative of degenerated RPE.

Vehicle in *P2rx7*<sup>-/-</sup>

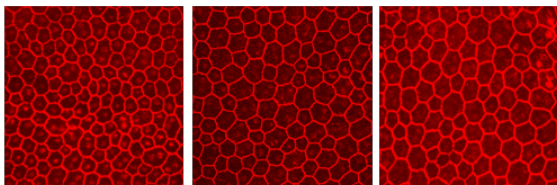

A $\beta$ O in *P2rx7*<sup>-/-</sup>

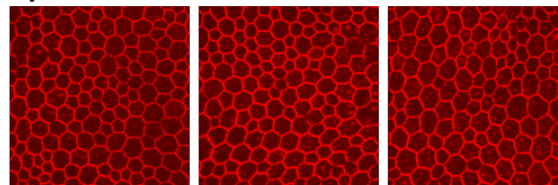

Vehicle in *P2rx7*<sup>hP2rx7FloX</sup>

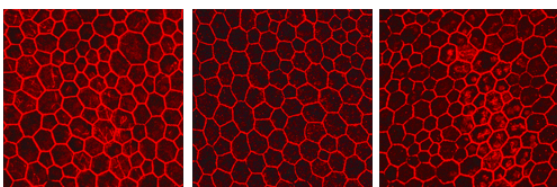

A $\beta$ O in *P2rx7*<sup>hP2rx7FloX</sup>

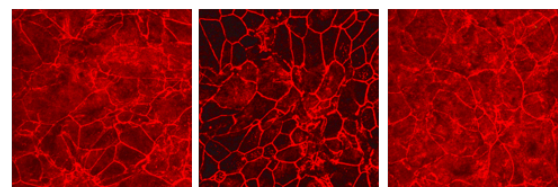

Vehicle in *P2rx7*<sup>hP2rx7FloX/Best1-Cre+</sup>

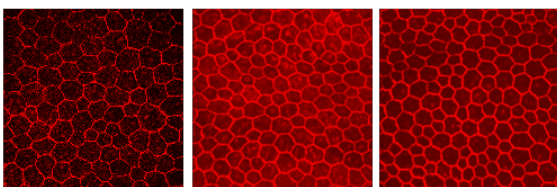

A $\beta$ O in *P2rx7*<sup>hP2rx7FloX/Best1-Cre+</sup>

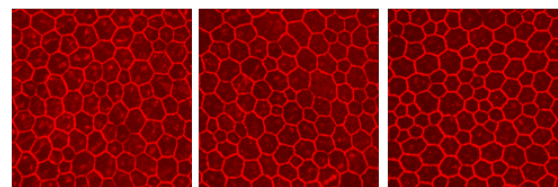

**Fig. S4 A $\beta$ Os-induced RPE degeneration requires *P2rx7* and human P2RX7 supports**

**A $\beta$ Os-induced RPE degeneration.** RPE flat mounts stained for zonula occludens-1 (ZO-1; red)

show that subretinal injection of A $\beta$ Os did not induce RPE degeneration in *P2rx7*<sup>-/-</sup> mice (top

row). A $\beta$ Os induced RPE degeneration in *P2rx7*<sup>hP2RX7FloX</sup> mice, which express human P2RX7 in

place of the deleted mouse *P2rx7* gene locus (middle row). Loss of regular hexagonal cellular

boundaries in ZO-1 stained flat mounts is indicative of degenerated RPE. A $\beta$ Os did not induce

RPE degeneration in *P2rx7*<sup>hP2RX7FloX/Best1-Cre+</sup> mice, in which human P2RX7 has been

conditionally ablated in the RPE (bottom row).

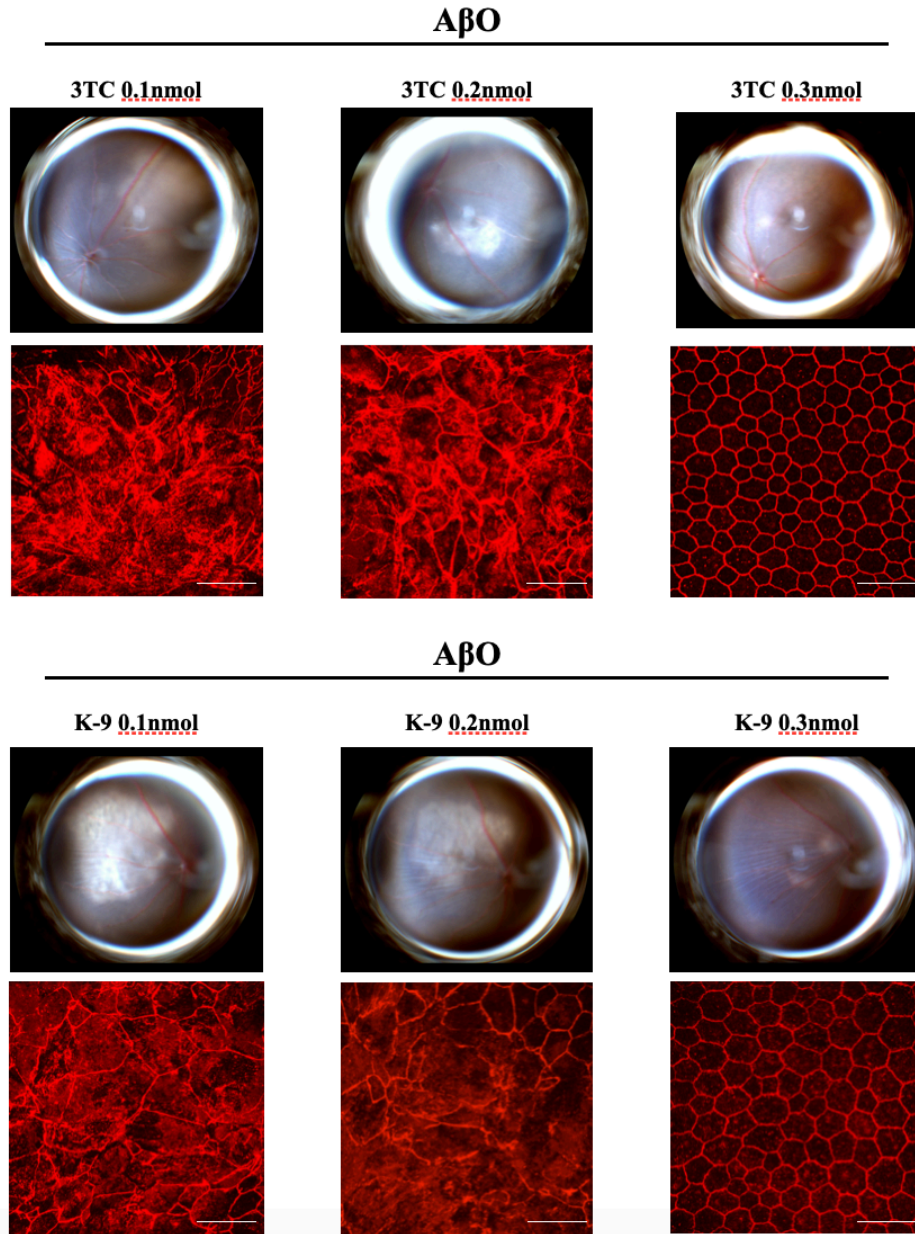

**Fig. S5 Dose curve assessment of the NRTI lamivudine (3TC) and the modified NRTI K-9.**

Subretinal injection of 1  $\mu$ M A $\beta$ O was followed by intravitreal injection of 0.1 nmol, 0.2 nmol or 0.3 nmol of 3TC or K-9. Fundus photographs (top row) and RPE flat mounts stained for zonula occludens-1 (ZO-1; red) (bottom row) of WT mice (n=4 per group). Loss of regular hexagonal cellular boundaries in ZO-1 stained flat mounts is indicative of degenerated RPE. Scale bars (50  $\mu$ m).

**A $\beta$ O + Vehicle**

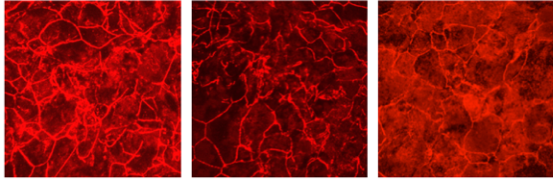

**A $\beta$ O + 3TC 0.5nmol**

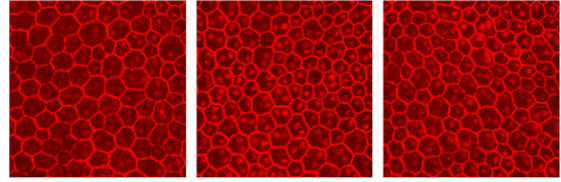

**A $\beta$ O + K-9 0.5nmol**

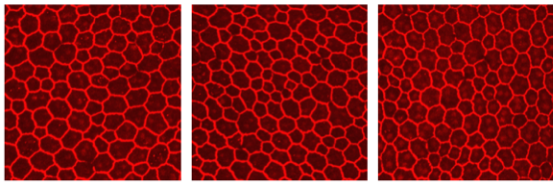

**A $\beta$ O + AZT 0.5nmol**

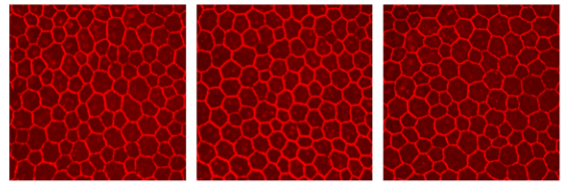

**A $\beta$ O + K-8 0.5nmol**

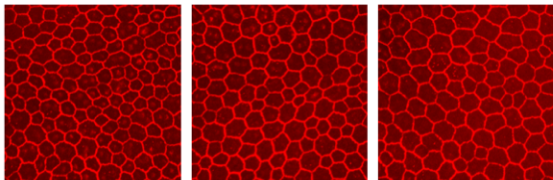

**Fig. S6 NRTIs and Kamuvudines block A $\beta$ O-induced RPE degeneration.** RPE flat mounts stained for zonula occludens-1 (ZO-1; red) show that A $\beta$ O-induced RPE degeneration in WT mice was blocked by intravitreal injection of the NRTIs 3TC or AZT or injection of the Kamuvudines K-8 or K-9.

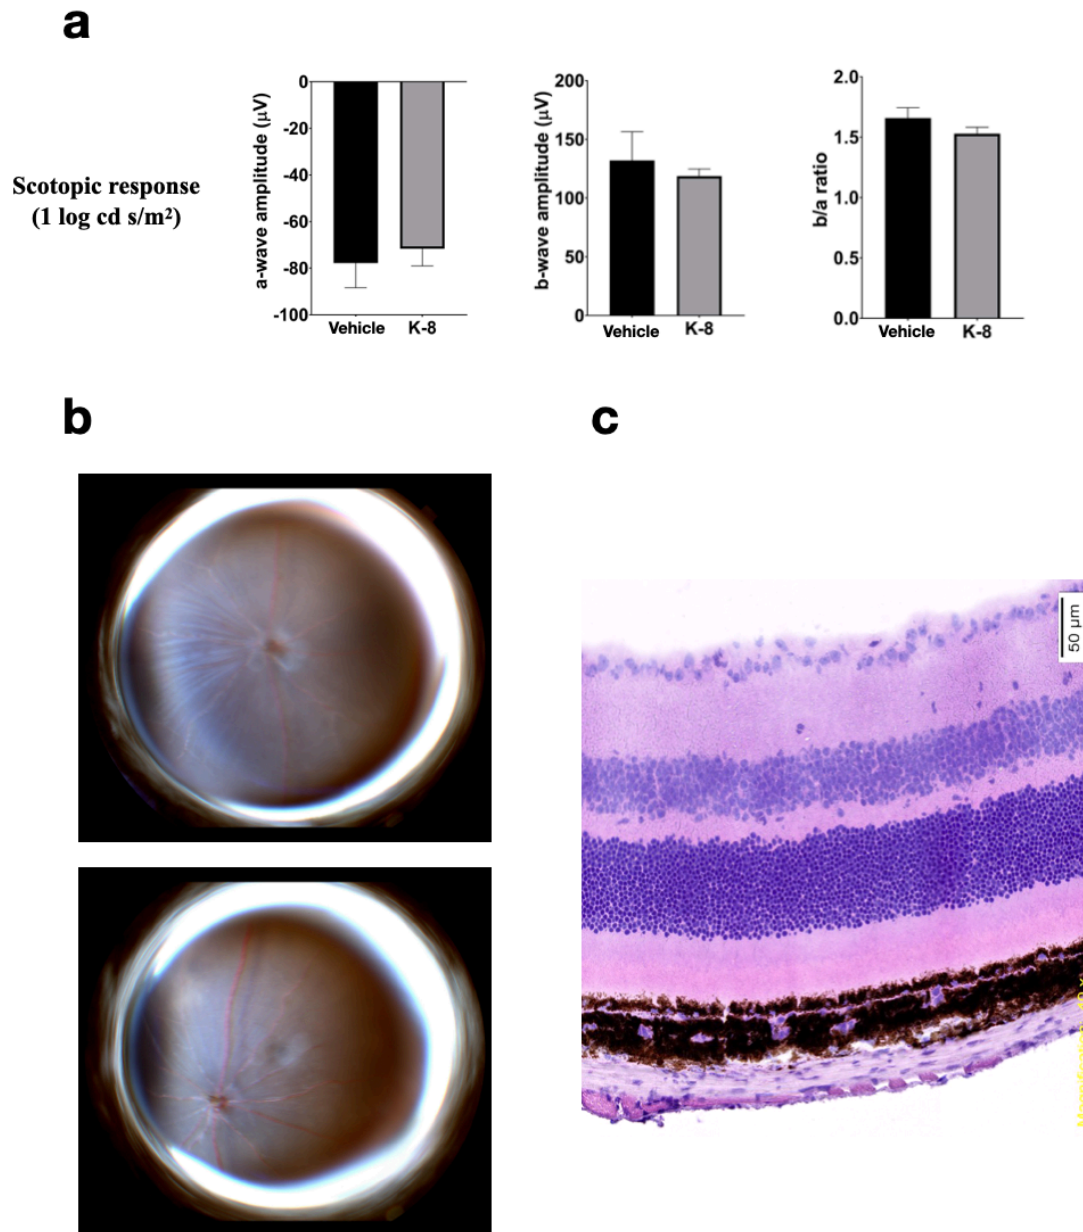

**Fig. S7 K-8 does not induce intraocular toxicity.** Scotopic full-field electroretinography (ERG), color fundus photography, and histology evaluations at 4 weeks after intravitreal injection of high-dose K-8 (12 nmol) or vehicle in WT mice. **(a)** ERG a-wave and b-wave amplitudes and b/a ratios were not significantly different between vehicle-treated and K-8-treated eyes. **(b)** Fundus images show normal retinal appearance and clear vitreous humor. **(c)** Hematoxylin- and eosin-stained retinal sections show normal neuroretinal, RPE, and choroidal morphology.  $N \geq 5$ . Error bars represent SEM.



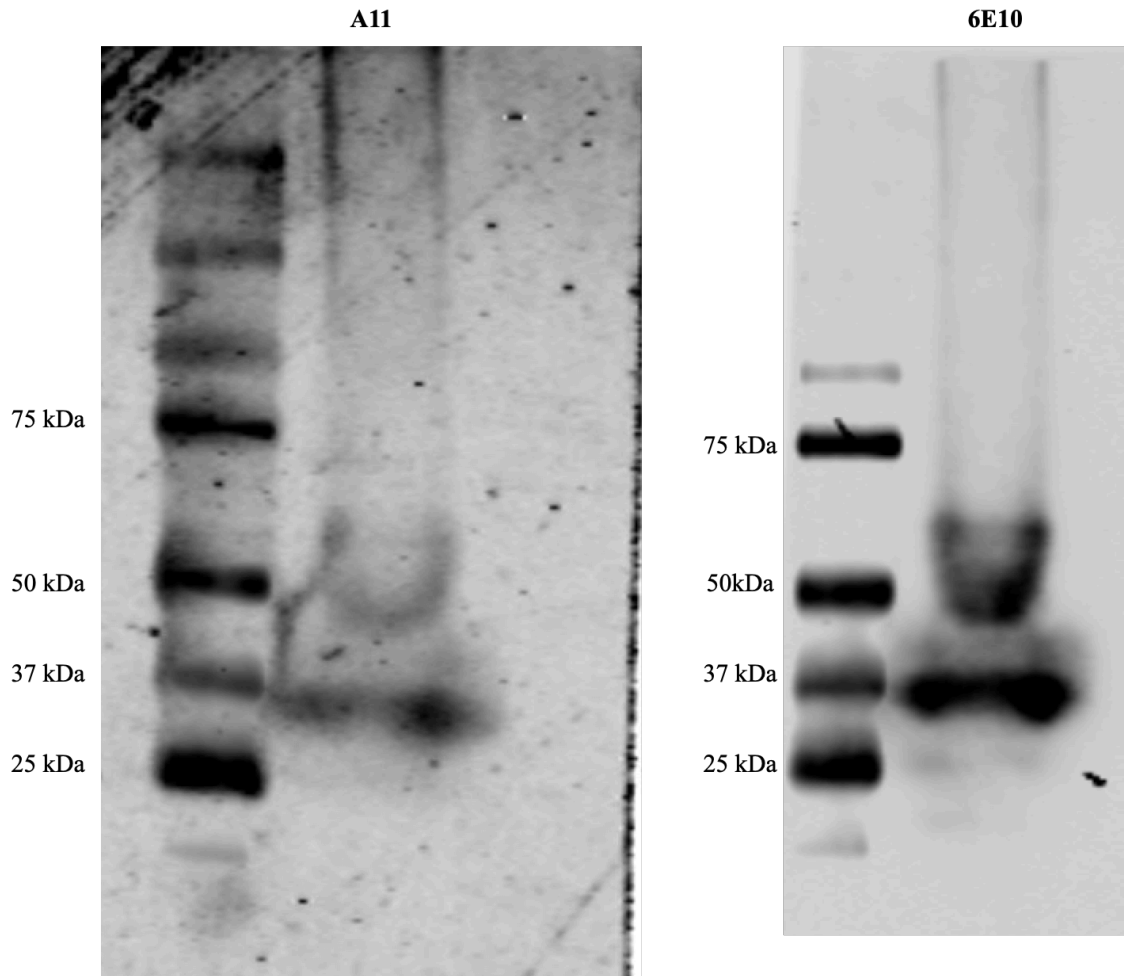

**Fig. S8 Confirmation of Amyloid  $\beta$  oligomer formation.** Western blot analysis of A $\beta$ O<sub>s</sub>. A $\beta$ O<sub>s</sub> were resolved on polyacrylamide gels under native running conditions and probed with A11 and 6E10 antibodies as indicated in the top panel.

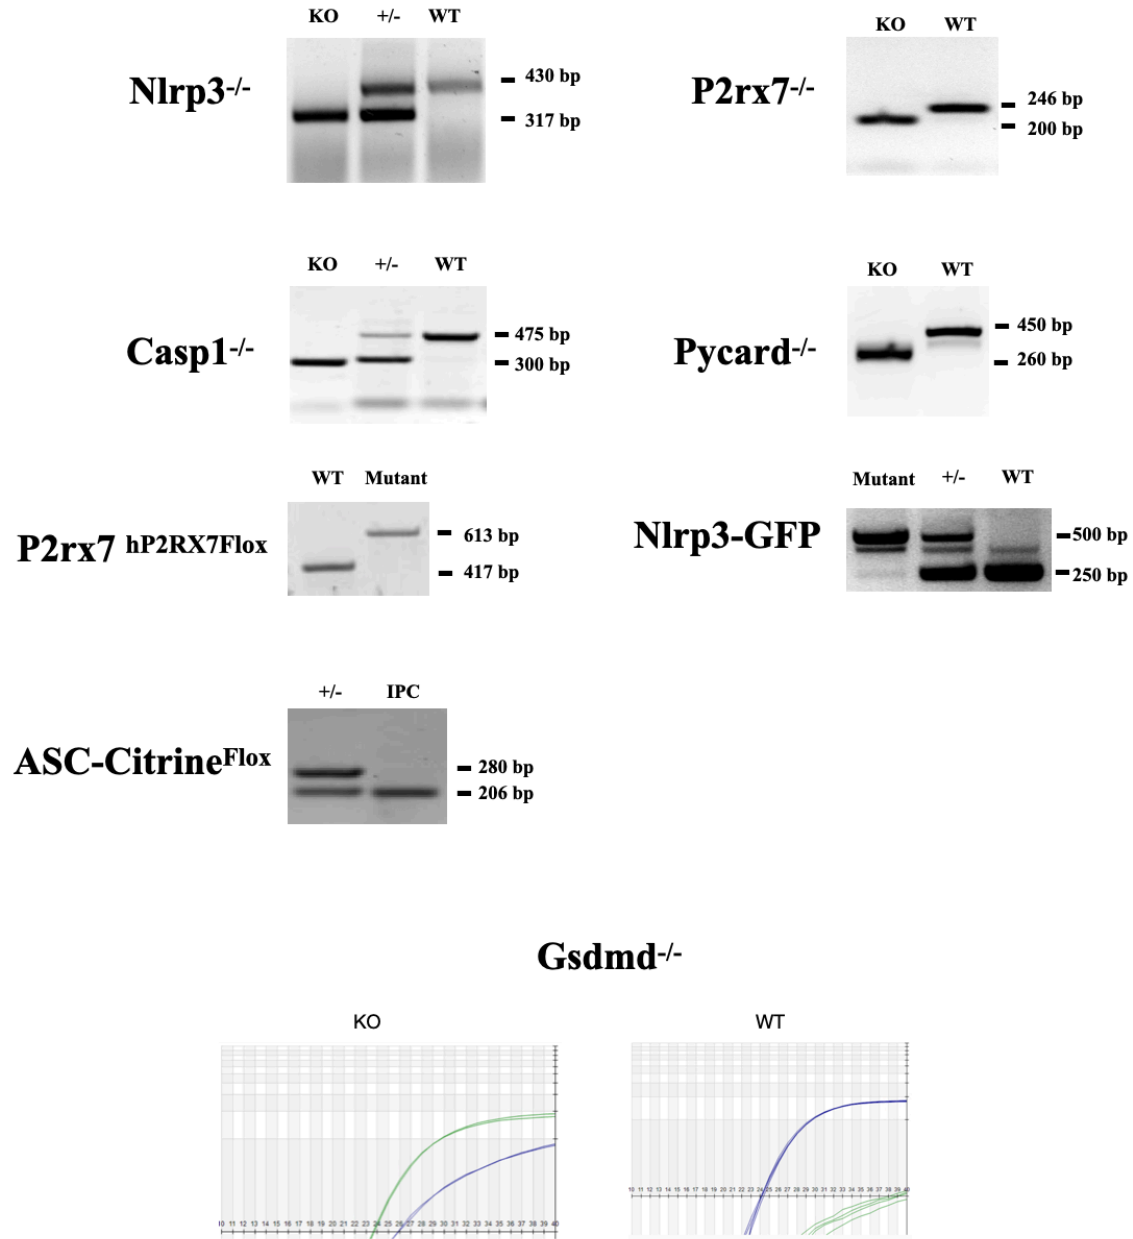

**Fig. S9 Confirmation of gene ablation in transgenic mice.** Genotyping performed by PCR of *Nlrp3<sup>-/-</sup>*, *Pycard<sup>-/-</sup>*, *Casp1<sup>-/-</sup>*, *P2rx7<sup>-/-</sup>*, *Gsdmd<sup>-/-</sup>*, *P2rx7<sup>hP2rx7FloX</sup>*, *Nlrp3-GFP*, and *ASC-Citrine<sup>FloX</sup>* mice. Wild-type (WT), heterozygous (+/-), knockout (KO), and mutant allele with the respective size are shown. *Gsdmd<sup>-/-</sup>* mice were genotyped by Transnetyx Inc. IPC, internal positive control.

## Vehicle

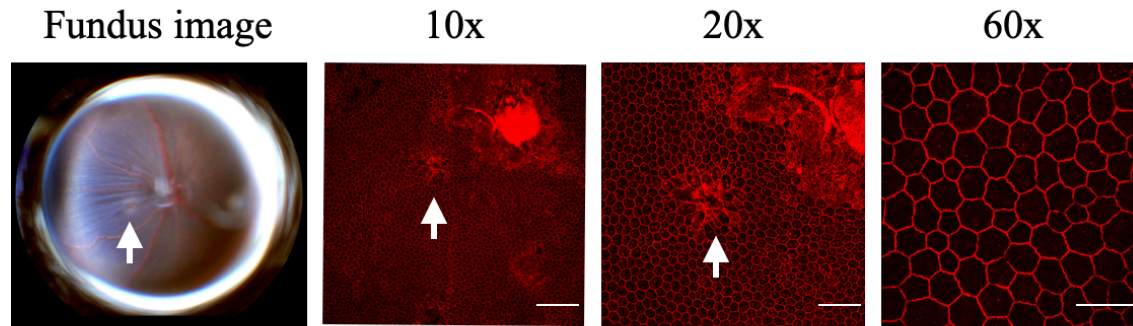

## A $\beta$ O

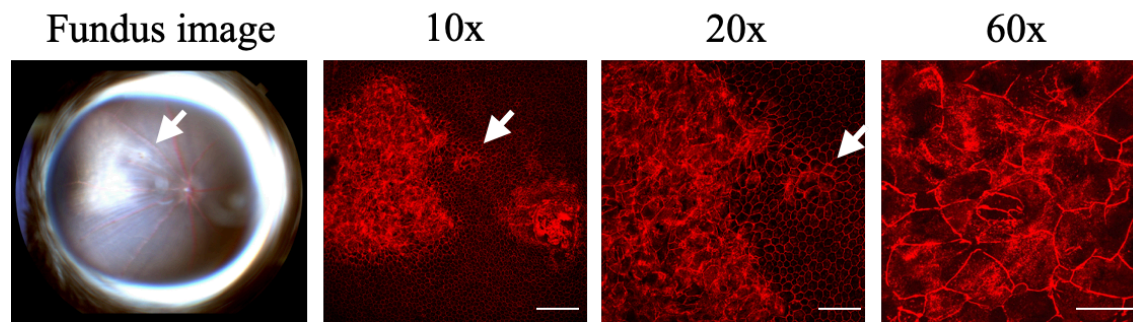

**Fig. S10 Identification of the injection site in mouse RPE flat mounts.** Subretinal injection of vehicle (top) or A $\beta$ O (lower) showing the fundus image (left), ZO-1 immunostaining (red) with lower (10 $\times$  and 20 $\times$ ) and higher magnification (60 $\times$ ) of the same eye. The injection site is identified by a stellate pattern in the RPE (white arrow), which corresponds to the region where the needle touches the RPE. The surrounding area is examined, and higher magnification images are acquired and analyzed. Scale bars, 10 $\times$  (200  $\mu$ m), 20 $\times$  (100  $\mu$ m), 60 $\times$  (50  $\mu$ m).

**Table S1. PCR primers used for genotyping**

| <b>Name</b>   | <b>5'-3' sequence</b>        |
|---------------|------------------------------|
| Nlrp3-F       | CGGTGGTTGCTAGGAGATGG         |
| Nlrp3-R       | ATCGCCTTCTTGACGAGTTC         |
| Pycard-1      | CTAAGCACAGTCATTGTGAGCTCC     |
| Pycard-2      | CTAGTTTGCTGGGGAAAGAAC        |
| Pycard-3      | AAGACAATAGCAGGCATGCTGG       |
| Casp1-F       | GAGACATATAAGGGAGAAGGG        |
| Casp1-R       | TGCTAAAGCGCATGCTCCAGACTG     |
| Gsdmd-F       | GGGAACATTCAGGGCAGAGT         |
| Gsdmd-R       | CAGCCCCACCAGAAATTTTCC        |
| Mouse P2rx7-F | TATACTGCCCTCGGTCTTG          |
| Mouse P2rx7-R | GCCAGAGGCCACTTGTGTAG         |
| Human P2rx7-1 | AGACTCTCACCAGCAGCAGCTC       |
| Human P2rx7-2 | GCCAAGCATTCTACCAGTTGAGC      |
| Human P2rx7-3 | CAGGATGTTTCTCGTGGTGTAG       |
| Cre-F         | ATGCCCAAGAAGAAGAGGAAGGTGTCCA |
| Cre-R         | TGGCCCAAATGTTGCTGGATAGTTTTTA |
| Nlrp3-gfp-1   | AAGTCGTGCTGCTTCATGT          |
| Nlrp3-gfp-2   | TCAAGCTAAGAGAACTTTCTG        |
| Nlrp3-gfp-3   | ACACTCGTCATCTTCAGCA          |
| Asc f/f-F     | CTTGGGTGGAGAGGCTATTC         |
| Asc f/f-R     | AGGTGAGATGACAGGAGATC         |
